# Supplementary material
Source: PubMed Central journal article supplement (PMC1595423)

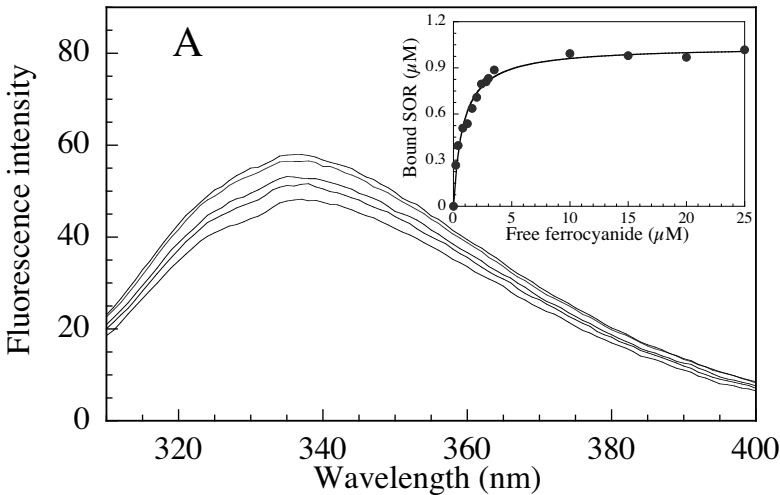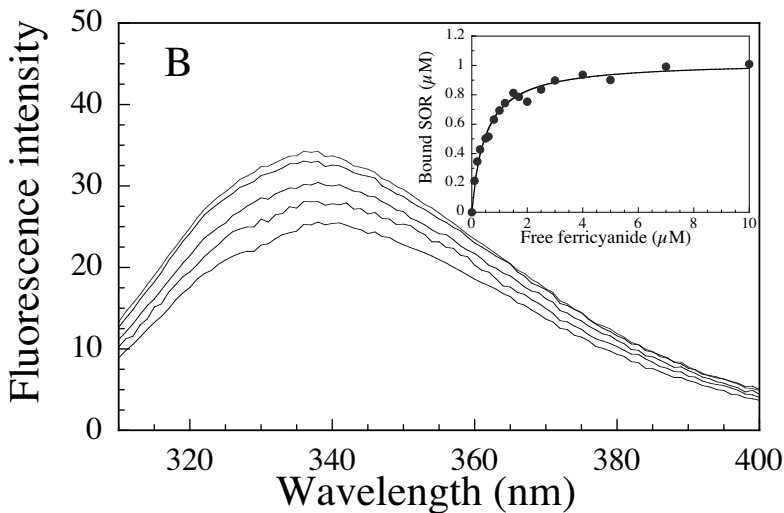

Supplement: pnas_0510828103_1.pdf [file pnas_0510828103_1.pdf]

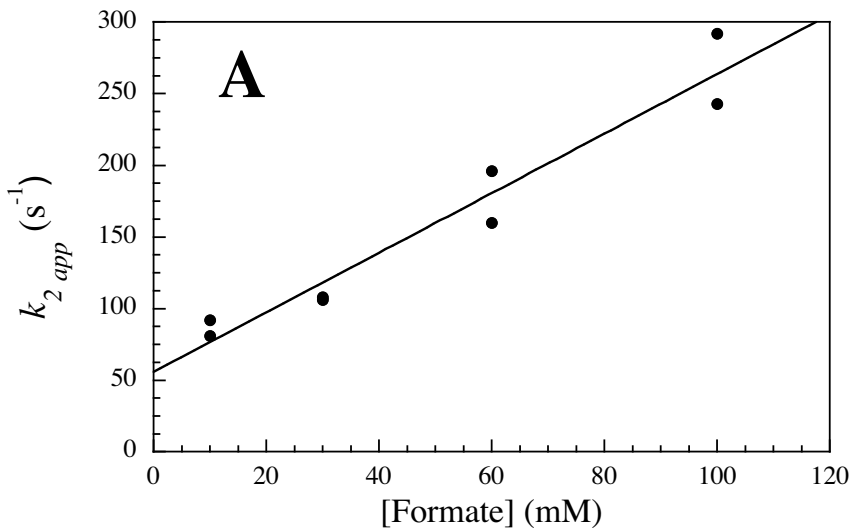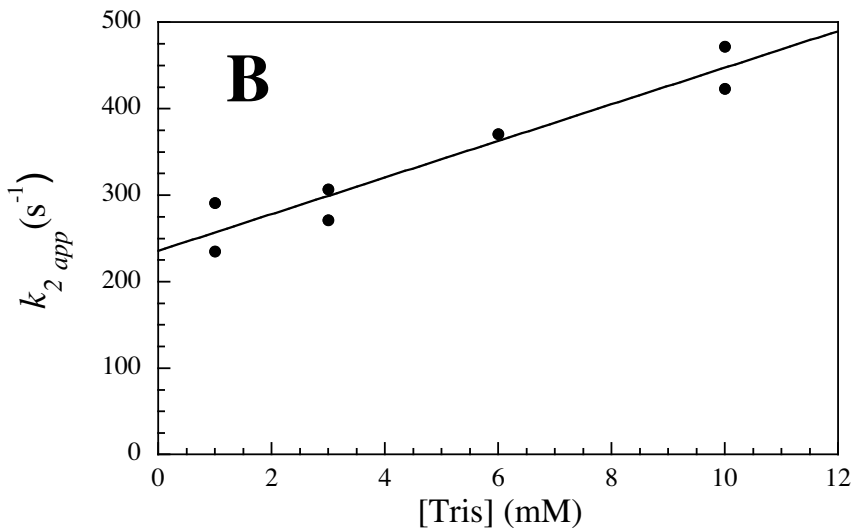

Supplement: pnas_0510828103_2.pdf [file pnas_0510828103_2.pdf]

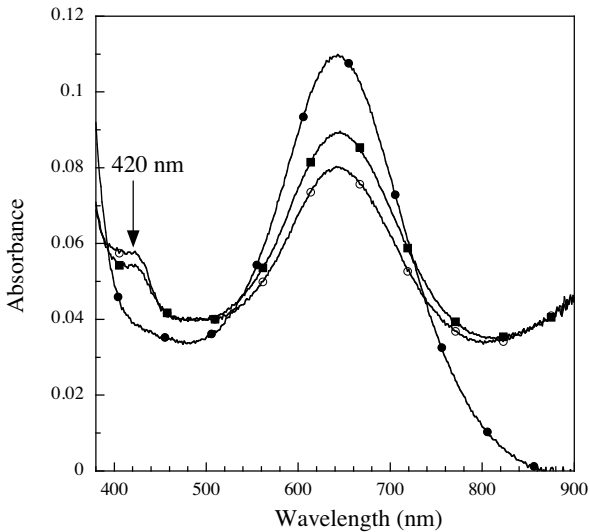

Supplement: pnas_0510828103_3.pdf [file pnas_0510828103_3.pdf]

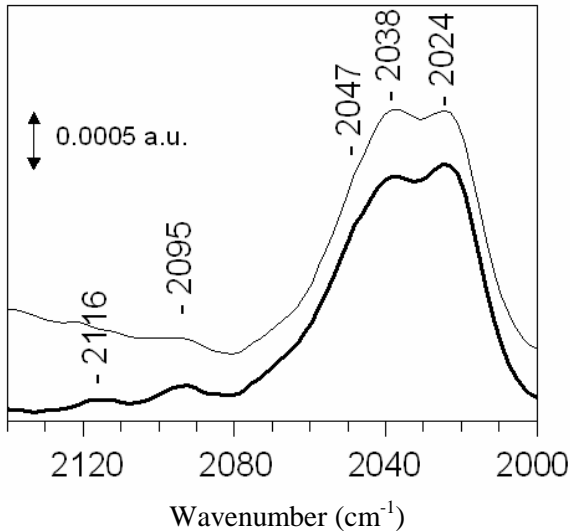

Supplement: pnas_0510828103_4.pdf [file pnas_0510828103_4.pdf]

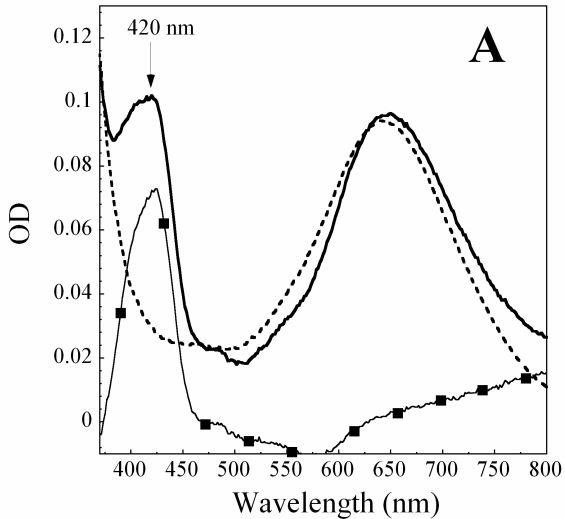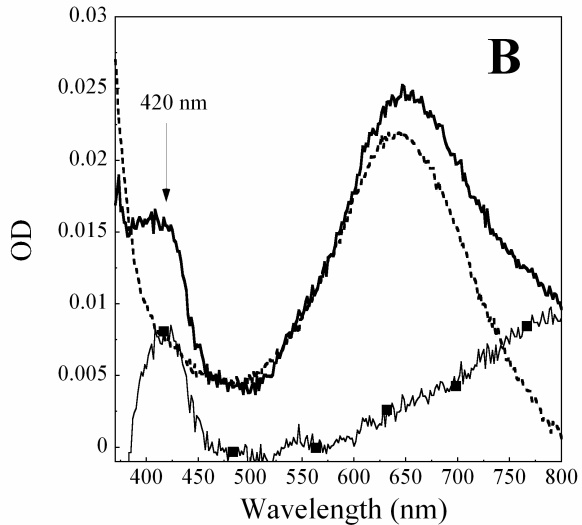

Supplement: pnas_0510828103_5.pdf [file pnas_0510828103_5.pdf]
